# Supplementary material for: Theoretical design of a dual-motor nanorotator composed of all-carboatomic cyclo[18]carbon and a figure-of-eight carbon hoop
Source: Royal Society of Chemistry journal article supplement (doi:10.1039/d3cc02262e), 2023-01-01
Supplement: d3cc02262e2.pdf [file d3cc02262e2.pdf]

## Supplementary Material

# Theoretical design of a dual-motor nanorotator composed of all-carboatomic cyclo[18]carbon and figure-of-eight carbon hoop

Zeyu Liu, <sup>\*a</sup> Xia Wang, <sup>a</sup> Tian Lu, <sup>\*b</sup> Xiufen Yan, <sup>a</sup> Jiaojiao Wang, <sup>a</sup> Yang Wu, <sup>a</sup> Jingbo Xu, <sup>a</sup>  
and Zhibo Xie <sup>a</sup>

<sup>a</sup>*School of Environmental and Chemical Engineering, Jiangsu University of Science and  
Technology, Zhenjiang 212100, People's Republic of China*

<sup>b</sup>*Beijing Kein Research Center for Natural Sciences, Beijing 100022, People's Republic of  
China*

**Contents:**

**Section S1.** Computational details.....S3

**Fig. S1.** Definitions of plane and ring of the loops in statistical analysis of MD trajectory.....S4

**Table S1** Optimized Cartesian coordinates for all species involved in the present work ( $C_{18}@OPP$ ,  $2C_{18}@OPP$ ,  $C_{18}@OPP^{TS}$ , and  $2C_{18}@OPP^{TS}$ ).....S7

**Fig. S2.** Comparison of different complexation schemes between  $C_{18}$  and OPP...S34

**Fig. S3.** DOS maps and energy levels of FMOs of (a) OPP, (b)  $C_{18}@OPP$ , and (c)  $2C_{18}@OPP$ .....S35

## Section S1. Computational details

Many theoretical studies have demonstrated that hybrid density functional containing more than 25% global Hartree-Fock (HF) exchange, such as M06-2X,<sup>S1</sup> or containing very high HF exchange at long-range region, such as  $\omega$ B97XD,<sup>S2</sup> combined with at least 6-311G(d) basis set,<sup>S3</sup> can replicate the ground-state polyynic structure of C<sub>18</sub> with alternating long and short bonds.<sup>S4-S6</sup> In contrast, the geometry of organic conjugated macrocycles with normal coordinated carbon atoms is relatively insensitive to the level of basis set. Therefore, we adopted the  $\omega$ B97XD method combined with 6-311G(d) for C<sub>18</sub> ring and 6-31G(d)<sup>S7</sup> for OPP to optimize all molecules and complexes studied. The vibrational frequencies were used to characterize the stationary point as local minimum or transition state. The PES scanning is also carried out at the same calculation level. Gaussian 16 (A.03)<sup>S8</sup> was used to conduct optimizations for minima and transition states, frequency analyses and potential surface scanning.

Intermolecular interaction between C<sub>18</sub> and OPP as well as C<sub>18</sub>@OPP was calculated using  $\omega$ B97X-V<sup>S9</sup> functional in combination with def2-TZVP basis set<sup>S10</sup> with counterpoise correction, because this level is able to accurately estimate  $E_{\text{int}}$  for a wide variety of weakly interacting complexes.<sup>S11</sup> The binding free energy of C<sub>18</sub>@OPP and 2C<sub>18</sub>@OPP was evaluated as  $G_{\text{bind}} = E_{\text{bind}} + \Delta G_{\text{b}}^{\text{corr}}$ , where  $\Delta G_{\text{b}}^{\text{corr}}$  is the variation of thermal correction to free energy during binding.  $\Delta G_{\text{b}}^{\text{corr}}$  and entropy were obtained based on harmonic frequencies by Shermo code.<sup>S12</sup> ORCA 5.0.3 program<sup>S13</sup> was used for calculations of electronic energies. The symmetry-adapted perturbation theory analysis was performed by PSI4 1.5 program.<sup>S14</sup>

MD simulation was realized by GROMACS 2018.8 program<sup>S15</sup> basically based on general amber force field (GAFF).<sup>S16</sup> Specifically, for representing C<sub>18</sub>, c1 atom type (suitable for *sp*-hybridized carbon) was assigned for the carbons, and c1-c1-c1 angle parameter was employed. Parameters of long and short C-C bonds in C<sub>18</sub> were respectively generated by modified Seminario method<sup>S17</sup> based on Hessian matrix at  $\omega$ B97XD/def2-TZVP level. For representing OPP, proper GAFF atom types and corresponding bond, angle, and dihedral parameters were assigned. However, we found the rigid structure of cyclooctatetrathiophene linker region between the two loops of OPP cannot be well maintained via GAFF bonded parameters during MD simulation, therefore the bonded parameters related to this region were produced by

modified Seminario method based on Hessian matrix at  $\omega$ B97XD/6-311G(d) level. The assignment of GAFF parameter, the modified Seminario calculation, and the generation of final GROMACS topology files were finished by Sobtop code.<sup>S18</sup>

In our statistical analysis of MD trajectory, the plane of C<sub>18</sub> is defined as the least-square fitted plane for all atoms in the ring. The plane of each loop in OPP is determined as the least-square fitted plane for the linker carbon atoms in phenyl rings, and the center of the loop is defined as the center of these atoms (see **Fig. S1** for illustration). The angular velocity is calculated for the rotation around the normal vector passing through the center of the C<sub>18</sub>.

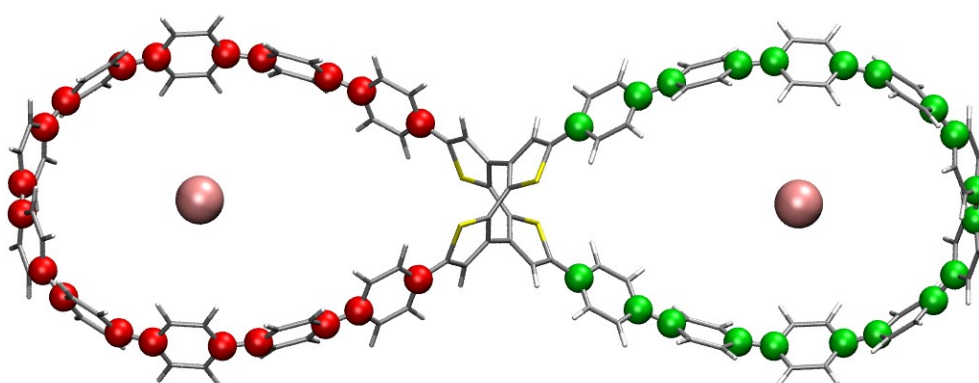

**Fig. S1.** Definitions of plane and ring of the loops in statistical analysis of MD trajectory. Red/green spheres highlight the atoms used to fit plane of loop-1/loop-2 of OPP. Pink spheres show the center of these atoms, which also correspond to the centers of the two loops.

The DOS analysis were finished by Multiwfn 3.8(dev) code.<sup>S19</sup> All isosurface and molecular structure maps were rendered by VMD software.<sup>S20</sup>

#### Notes and references

- S1 Y .Zhao, D. G. Truhlar, *Theor. Chem. Acc.*, 2008, **120**, 215–241.  
S2 J. D. Chai, M. Head-Gordon, *Phys. Chem. Chem. Phys.*, 2008, **10**, 6615–6620.  
S3 W. J. Hehre, R. Ditchfield, J. A. Pople, *J. Chem. Phys.*, 1972, **56**, 2257.  
S4 Z. Liu, T. Lu, Q. Chen, *Carbon*, 2020, **165**, 468–475.  
S5 G. V. Baryshnikov, R. R. Valiev, A. V. Kuklin, D. Sundholm, H. Ågren, *J. Phys. Chem. Lett.*, 2019, **10**, 6701–6705.  
S6 Z. Liu, T. Lu, Q. Chen, *J. Mol. Model.*, 2021, **27**, 42.

- S7 R. Krishnan, J. S. Binkley, R. Seeger, J. A. Pople, *J. Chem. Phys.*, 1980, **72**, 650.
- S8 M. J. Frisch, G. W. Trucks, H. B. Schlegel, G. E. Scuseria, M. A. Robb, J. R. Cheeseman, G. Scalmani, V. Barone, G. A. Petersson, H. Nakatsuji, X. Li, M. Caricato, A. V. Marenich, J. Bloino, B. G. Janesko, R. Gomperts, B. Mennucci, H. P. Hratchian, J. V. Ortiz, A. F. Izmaylov, J. L. Sonnenberg, D. Williams-Young, F. Ding, F. Lipparini, F. Egidi, J. Goings, B. Peng, A. Petrone, T. Henderson, D. Ranasinghe, V. G. Zakrzewski, J. Gao, N. Rega, G. Zheng, W. Liang, M. Hada, M. Ehara, K. Toyota, R. Fukuda, J. Hasegawa, M. Ishida, T. Nakajima, Y. Honda, O. Kitao, H. Nakai, T. Vreven, K. Throssell, J. A. Montgomery, Jr., J. E. Peralta, F. Ogliaro, M. J. Bearpark, J. J. Heyd, E. N. Brothers, K. N. Kudin, V. N. Staroverov, T. A. Keith, R. Kobayashi, J. Normand, K. Raghavachari, A. P. Rendell, J. C. Burant, S. S. Iyengar, J. Tomasi, M. Cossi, J. M. Millam, M. Klene, C. Adamo, R. Cammi, J. W. Ochterski, R. L. Martin, K. Morokuma, O. Farkas, J. B. Foresman, D. J. Fox, Gaussian 16, revision A. 03; Gaussian, Inc.: Wallingford, CT, 2016.
- S9 N. Mardirossian, M. Head-Gordon, *Phys. Chem. Chem. Phys.* 2014, **16**, 9904–9924.
- S10 F. Weigend, R. Ahlrichs, *Phys. Chem. Chem. Phys.*, 2005, **7**, 3297–3305.
- S11 N. Mardirossian, M. Head-Gordon, *Mol. Phys.*, 2017, **115**, 2315–2372.
- S12 T. Lu, Q. Chen, *Comput. Theor. Chem.*, 2021, **1200**, 113249.
- S13 F. Neese. *WIREs: Comp. Mol. Sci.*, 2022, e1606.
- S14 D. G. A. Smith, L. A. Burns, A. C. Simmonett, R. M. Parrish, M. C. Schieber, R. Galvelis, P. Kraus, H. Kruse, R. Di Remigio, A. Alenaizan, A. M. James, S. Lehtola, J. P. Misiewicz, M. Scheurer, R. A. Shaw, J. B. Schriber, Y. Xie, Z. L. Glick, D. A. Sirianni, J. S. O'Brien, J. M. Waldrop, A. Kumar, E. G. Hohenstein, B. P. Pritchard, B. R. Brooks, H. F. Schaefer, A. Y. Sokolov, K. Patkowski, A. E. DePrince, U. Bozkaya, R. A. King, F. A. Evangelista, J. M. Turney, T. D. Crawford, C. D. Sherrill, *J. Chem. Phys.*, 2020, **152**, 184108.
- S15 M. J. Abrahama, T. Murtola, R. Schulz, S. Páll, J. C. Smith, B. Hess, E. Lindahl, *SoftwareX*, 2015, **1–2**, 19–25.
- S16 J. Wang, R. M. Wolf, J. W. Caldwell, P. A. Kollman, D. A. Case, *J. Comput. Chem.*, 2004, **25**, 1157–1174.
- S17 A. E. A. Allen, M. C. Payne, D. J. Cole, *J. Chem. Theory Comput.*, 2018, **14**, 274–281.
- S18 T. Lu, <http://sobereva.com/soft/Sobtop> (accessed on May 1, 2023).

S19 T. Lu, F. Chen. *J. Comput. Chem.*, 2012, **33**, 580–592.

S20 W. Humphrey, A. Dalke, K. Schulten, *J. Mol. Graphics.*, 1996, **14**, 33–38.

**Table S1** Optimized Cartesian coordinates for all species involved in the present work ( $C_{18}@OPP$ ,  $2C_{18}@OPP$ ,  $C_{18}@OPP^{TS}$ , and  $2C_{18}@OPP^{TS}$ ). The values are given in Å.

| $C_{18}@OPP$ (charge = 0, spin multiplicity = 1) |              |             |             |
|--------------------------------------------------|--------------|-------------|-------------|
| atom                                             | $x$          | $y$         | $z$         |
| S                                                | -2.85851431  | -0.93088222 | 2.80017220  |
| S                                                | 0.33943849   | 0.85186407  | 2.75643388  |
| S                                                | 0.33939194   | -0.85182038 | -2.75656451 |
| S                                                | -2.85849134  | 0.93106651  | -2.80028269 |
| C                                                | -2.68768092  | -2.60960541 | 0.87566585  |
| H                                                | -2.87837508  | -3.43832569 | 0.20332802  |
| C                                                | 0.17029879   | -2.54916217 | -0.84909621 |
| H                                                | 0.37734042   | -3.37002938 | -0.17185243 |
| C                                                | -2.68760679  | 2.60976271  | -0.87575431 |
| H                                                | -2.87825605  | 3.43847344  | -0.20339418 |
| C                                                | 0.17047438   | 2.54918192  | 0.84892927  |
| H                                                | 0.37757647   | 3.37001896  | 0.17166962  |
| C                                                | -1.72863204  | -1.59440037 | 0.58917250  |
| C                                                | 6.46409880   | -4.72080830 | -4.70524392 |
| H                                                | 5.88771243   | -4.30456771 | -5.52696833 |
| C                                                | 4.53999146   | -4.25928415 | -3.15920668 |
| C                                                | 10.02522377  | -5.78672065 | -3.99812627 |
| C                                                | 5.87229507   | -4.84326810 | -3.44305989 |
| C                                                | -0.84245308  | -1.57862362 | -0.59258896 |
| C                                                | 17.37060949  | -2.84741585 | -1.91282917 |
| C                                                | 18.23282365  | -0.59263661 | -0.44653638 |
| C                                                | 8.55707404   | -5.62150828 | -3.87175320 |
| C                                                | -15.21143191 | -5.67837462 | 3.84120511  |
| C                                                | -14.52540620 | -6.74162846 | 3.24162860  |
| H                                                | -15.07147606 | -7.45896410 | 2.63468595  |
| C                                                | -13.14677760 | -6.86584075 | 3.36967821  |
| H                                                | -12.63600233 | -7.68119769 | 2.86437452  |
| C                                                | -12.40327992 | -5.93124208 | 4.10109147  |
| C                                                | -13.10623971 | -4.94102227 | 4.79611979  |
| H                                                | -12.55936874 | -4.19241595 | 5.36184821  |
| C                                                | -14.48219677 | -4.81759948 | 4.66935445  |
| H                                                | -14.98237785 | -3.97405848 | 5.13607412  |
| C                                                | -8.21075500  | 5.13375915  | -3.62687302 |
| C                                                | -8.95936639  | 5.69816490  | -2.58907173 |

|   |              |             |             |
|---|--------------|-------------|-------------|
| H | -8.52015260  | 5.78526044  | -1.59912265 |
| C | -10.29224645 | 6.04109049  | -2.77571200 |
| H | -10.87452738 | 6.38483472  | -1.92562719 |
| C | -10.92433703 | 5.83937453  | -4.00810100 |
| C | -10.14375286 | 5.37508430  | -5.07392331 |
| H | -10.59174104 | 5.25919969  | -6.05707037 |
| C | -8.81315476  | 5.02453404  | -4.88582088 |
| H | -8.23764937  | 4.63796003  | -5.72265914 |
| C | 16.50713129  | -3.90984788 | -2.48455119 |
| C | 0.91223083   | -2.29129858 | -1.97161040 |
| C | 18.46946108  | 1.88990352  | -0.02641910 |
| H | 18.93492280  | 2.03179581  | -0.99809696 |
| C | 3.57734857   | -4.92873055 | -2.39609410 |
| H | 3.76581133   | -5.94878288 | -2.07241252 |
| C | 18.23280465  | 0.59257235  | 0.44611257  |
| C | 17.71228898  | -0.45435723 | -1.73761247 |
| H | 17.50982174  | 0.53743513  | -2.13086349 |
| C | -12.40334770 | 5.93127563  | -4.10104160 |
| C | -13.14686121 | 6.86581069  | -3.36956434 |
| H | -12.63609557 | 7.68113133  | -2.86419225 |
| C | -14.52548918 | 6.74157310  | -3.24153970 |
| H | -15.07157322 | 7.45886175  | -2.63455469 |
| C | -15.21149599 | 5.67835076  | -3.84119544 |
| C | -14.48224349 | 4.81764965  | -4.66940732 |
| H | -14.98240802 | 3.97413498  | -5.13619199 |
| C | -13.10628660 | 4.94110290  | -4.79615660 |
| H | -12.55939662 | 4.19255381  | -5.36194314 |
| C | 17.37050202  | 2.84733738  | 1.91235893  |
| C | 12.84501745  | -5.65633418 | -3.79124056 |
| C | -8.21070753  | -5.13365640 | 3.62693212  |
| C | -8.81315281  | -5.02425236 | 4.88584162  |
| H | -8.23769393  | -4.63749980 | 5.72262945  |
| C | -10.14373868 | -5.37484088 | 5.07395466  |
| H | -10.59176178 | -5.25882527 | 6.05707000  |
| C | -10.92426798 | -5.83933045 | 4.00817688  |
| C | -10.29212114 | -6.04122855 | 2.77584702  |
| H | -10.87435217 | -6.38513608 | 1.92579408  |
| C | -8.95924552  | -5.69828180 | 2.58920018  |



|   |             |             |             |
|---|-------------|-------------|-------------|
| H | -8.51997644 | -5.78553789 | 1.59928926  |
| C | 3.06481626  | -2.33717052 | -3.23719310 |
| H | 2.90223787  | -1.30661470 | -3.53975948 |
| C | 15.72559973 | -4.67602957 | -1.61276320 |
| H | 15.90990571 | -4.62576355 | -0.54366385 |
| C | 14.61106370 | 5.36361253  | 2.07134032  |
| H | 13.94949890 | 5.83371117  | 1.34980623  |
| C | 6.61881700  | -5.43503940 | -2.41992481 |
| H | 6.18679632  | -5.52665242 | -1.42725836 |
| C | 8.55721824  | 5.62164799  | 3.87154835  |
| C | 18.04452249 | 2.99861596  | 0.69406802  |
| H | 18.18233242 | 3.99195040  | 0.27535824  |
| C | 10.76043576 | -4.85603295 | -4.74013328 |
| H | 10.24033570 | -4.09645500 | -5.31591636 |
| C | 14.61142524 | -5.36397269 | -2.07185467 |
| H | 13.95002861 | -5.83425236 | -1.35028040 |
| C | 7.93932019  | -5.81139185 | -2.62950747 |
| H | 8.52348118  | -6.18010276 | -1.79146014 |
| C | -0.86652390 | -0.58558331 | -1.54211871 |
| C | 18.04463542 | -2.99868509 | -0.69453754 |
| H | 18.18250662 | -3.99201759 | -0.27584341 |
| C | 10.73815914 | 6.73339361  | 3.25132938  |
| H | 10.20069207 | 7.50863976  | 2.71222878  |
| C | 0.91237051  | 2.29129436  | 1.97146429  |
| C | 14.23833543 | 5.31007477  | 3.41837274  |
| C | 17.28997204 | -1.56182124 | -2.45801409 |
| H | 16.76615869 | -1.40988677 | -3.39704871 |
| C | -6.88490457 | 4.53104626  | -3.34473308 |
| C | -6.59412194 | 3.25331276  | -3.83444956 |
| H | -7.31197495 | 2.75158215  | -4.47677309 |
| C | -5.44737986 | 2.57892113  | -3.44374209 |
| H | -5.29297208 | 1.56248932  | -3.79474540 |
| C | -4.53502820 | 3.16071226  | -2.55526005 |
| C | -4.78969789 | 4.46875496  | -2.12029820 |
| H | -4.07948563 | 4.96802303  | -1.46803304 |
| C | -5.94711814 | 5.13583741  | -2.49996565 |
| H | -6.12767627 | 6.14242121  | -2.13251907 |
| C | 18.46951850 | -1.88996727 | 0.02597560  |

|   |             |             |             |
|---|-------------|-------------|-------------|
| H | 18.93497148 | -2.03186444 | 0.99765719  |
| C | 4.54018920  | 4.25919924  | 3.15902736  |
| C | 12.14231293 | -4.79214071 | -4.63897049 |
| H | 12.66965340 | -3.98322753 | -5.13556954 |
| C | -1.71238804 | 0.60637375  | -1.54393704 |
| C | 12.12205518 | -6.66932570 | -3.14958073 |
| H | 12.64413790 | -7.39199476 | -2.52830679 |
| C | 7.93948207  | 5.81136401  | 2.62926046  |
| H | 8.52363872  | 6.18003720  | 1.79119552  |
| C | 12.12213291 | 6.66949239  | 3.14918418  |
| H | 12.64417336 | 7.39202227  | 2.52771448  |
| C | 10.76061436 | 4.85652792  | 4.74019614  |
| H | 10.24053880 | 4.09711363  | 5.31621566  |
| C | -3.39354913 | 2.39491298  | -2.03085293 |
| C | 17.71226136 | 0.45429178  | 1.73718558  |
| H | 17.50982656 | -0.53750331 | 2.13044777  |
| C | 5.87249330  | 4.84318751  | 3.44286149  |
| C | 2.11394413  | 2.99344059  | 2.44616937  |
| C | 6.61901407  | 5.43490626  | 2.41968241  |
| H | 6.18700662  | 5.52640206  | 1.42699954  |
| C | 17.28991774 | 1.56175680  | 2.45757857  |
| H | 16.76611683 | 1.40983413  | 3.39662251  |
| C | 10.73808966 | -6.73324195 | -3.25170421 |
| H | 10.20065386 | -7.50862029 | -2.71276100 |
| C | 16.23112652 | 3.99638763  | 3.85436255  |
| H | 16.86111129 | 3.46710144  | 4.56422969  |
| C | 4.25072667  | 2.96151153  | 3.59246465  |
| H | 4.99232993  | 2.41282713  | 4.16584600  |
| C | 7.77981262  | 5.10962409  | 4.91727709  |
| H | 8.21543509  | 4.99551562  | 5.90594561  |
| C | 3.57762432  | 4.92860697  | 2.39577667  |
| H | 3.76615144  | 5.94861698  | 2.07199988  |
| C | 3.06487450  | 2.33719976  | 3.23720096  |
| H | 2.90219173  | 1.30670669  | 3.53992834  |
| C | 14.23832871 | -5.30998370 | -3.41876495 |
| C | 7.77965615  | -5.10945623 | -4.91746850 |
| H | 8.21530200  | -4.99525183 | -5.90611584 |
| C | -3.39359066 | -2.39473825 | 2.03077790  |

|   |              |             |             |
|---|--------------|-------------|-------------|
| C | 2.11378940   | -2.99346571 | -2.44632153 |
| C | -0.86652623  | 0.58571188  | 1.54200219  |
| C | 4.25064841   | -2.96150825 | -3.59246524 |
| H | 4.99235103   | -2.41278330 | -4.16567902 |
| C | -1.71245050  | -0.60620510 | 1.54379752  |
| C | 10.02534956  | 5.78699217  | 3.99793747  |
| C | -18.06709169 | -4.65060556 | 1.63902255  |
| H | -18.24858747 | -4.60331168 | 0.56926162  |
| C | -16.95667885 | -5.34172751 | 2.10355054  |
| H | -16.29636132 | -5.82206270 | 1.38727033  |
| C | -16.59254225 | -5.29431127 | 3.45344052  |
| C | -17.47031496 | -4.66085123 | 4.34242647  |
| H | -17.24992332 | -4.66234675 | 5.40663322  |
| C | -18.58282746 | -3.97001005 | 3.87756186  |
| H | -19.21493355 | -3.43973822 | 4.58496375  |
| C | -18.85626176 | -3.88661297 | 2.50639188  |
| C | -1.72856190  | 1.59455030  | -0.58930032 |
| C | -0.84235384  | 1.57871940  | 0.59244732  |
| C | 2.38056874   | -4.31230340 | -2.05528188 |
| H | 1.64472228   | -4.86130016 | -1.47530604 |
| C | -6.88489171  | -4.53088234 | 3.34474333  |
| C | -5.94691768  | -5.13581996 | 2.50029494  |
| H | -6.12731463  | -6.14253440 | 2.13312571  |
| C | -4.78951248  | -4.46871473 | 2.12060933  |
| H | -4.07911838  | -4.96808373 | 1.46861696  |
| C | -4.53507588  | -3.16051003 | 2.55521233  |
| C | -5.44764572  | -2.57853387 | 3.44335067  |
| H | -5.29342585  | -1.56195989 | 3.79402249  |
| C | -6.59435652  | -3.25295220 | 3.83409958  |
| H | -7.31238009  | -2.75112304 | 4.47615519  |
| C | 16.50697095  | 3.90975585  | 2.48403500  |
| C | 15.72518803  | 4.67562209  | 1.61219488  |
| H | 15.90927541  | 4.62506410  | 0.54307168  |
| C | 12.14247671  | 4.79266003  | 4.63902371  |
| H | 12.66993101  | 3.98399234  | 5.13590116  |
| C | 16.23101602  | -3.99616857 | -3.85484636 |
| H | 16.86082998  | -3.46669646 | -4.56472584 |
| C | 12.84511736  | 5.65664184  | 3.79101550  |

|   |              |             |             |
|---|--------------|-------------|-------------|
| C | 15.11582477  | -4.68479916 | -4.31374071 |
| H | 14.89064746  | -4.68577518 | -5.37681180 |
| C | 15.11602358  | 4.68512389  | 4.31331964  |
| H | 14.89107202  | 4.68638841  | 5.37643889  |
| C | 2.38082430   | 4.31221615  | 2.05498172  |
| H | 1.64503126   | 4.86120076  | 1.47492814  |
| C | -16.95674394 | 5.34162506  | -2.10355745 |
| H | -16.29643778 | 5.82195126  | -1.38726107 |
| C | -18.06714995 | 4.65048119  | -1.63904803 |
| H | -18.24865092 | 4.60316658  | -0.56928888 |
| C | -18.85630934 | 3.88649821  | -2.50643565 |
| C | -18.58286758 | 3.96992383  | -3.87760194 |
| H | -19.21496361 | 3.43965795  | -4.58501752 |
| C | -17.47036211 | 4.66078965  | -4.34244809 |
| H | -17.24997375 | 4.66231439  | -5.40665544 |
| C | -16.59259966 | 5.29424417  | -3.45344736 |
| C | 6.46428349   | 4.72086198  | 4.70505624  |
| H | 5.88791463   | 4.30466202  | 5.52681408  |
| C | -20.84745674 | -1.89343210 | -0.01058858 |
| H | -21.31484413 | -2.04657646 | -0.97974406 |
| C | -20.61910480 | -0.59044306 | 0.45100301  |
| C | -20.09659296 | -0.44286429 | 1.74080738  |
| H | -19.90312359 | 0.55236602  | 2.12986874  |
| C | -19.66144008 | -1.54269527 | 2.46605811  |
| H | -19.14011254 | -1.38047942 | 3.40487796  |
| C | -19.73029816 | -2.83306558 | 1.92925926  |
| C | -20.40949393 | -2.99517410 | 0.71494133  |
| H | -20.54115572 | -3.99165128 | 0.30151785  |
| C | -19.66146162 | 1.54257068  | -2.46612547 |
| H | -19.14013170 | 1.38036886  | -3.40494663 |
| C | -19.73033907 | 2.83293690  | -1.92931898 |
| C | -20.40954521 | 2.99503122  | -0.71500524 |
| H | -20.54122499 | 3.99150501  | -0.30157916 |
| C | -20.84749320 | 1.89327947  | 0.01051870  |
| H | -21.31488938 | 2.04641298  | 0.97967168  |
| C | -20.61911528 | 0.59029592  | -0.45107592 |
| C | -20.09660069 | 0.44272993  | -1.74088074 |
| H | -19.90311814 | -0.55249624 | -2.12994660 |

|   |             |             |             |
|---|-------------|-------------|-------------|
| C | 10.64752949 | 3.06211431  | 1.95381990  |
| C | 9.43891120  | 2.90346009  | 1.85708300  |
| C | 8.26021068  | 2.35282182  | 1.50903554  |
| C | 7.45189566  | 1.57833672  | 1.01635395  |
| C | 6.98756538  | 0.51426745  | 0.33218587  |
| C | 6.98628102  | -0.51422531 | -0.32975361 |
| C | 7.45265519  | -1.57760112 | -1.01362923 |
| C | 8.25890023  | -2.35346607 | -1.50745651 |
| C | 9.43850072  | -2.90267025 | -1.85480555 |
| C | 10.64667895 | -3.06359678 | -1.95300108 |
| C | 11.97411441 | -2.87274142 | -1.83359666 |
| C | 13.04707315 | -2.37817129 | -1.51724149 |
| C | 13.94238755 | -1.53130899 | -0.97338952 |
| C | 14.38602632 | -0.56972240 | -0.36058920 |
| C | 14.38492002 | 0.56875276  | 0.36038297  |
| C | 13.94385755 | 1.53111321  | 0.97382203  |
| C | 13.04691704 | 2.37654334  | 1.51723235  |
| C | 11.97528056 | 2.87301929  | 1.83508548  |

---



---

2C<sub>18</sub>@OPP (charge = 0, spin multiplicity = 1)

| atom | x           | y           | z           |
|------|-------------|-------------|-------------|
| S    | 1.65459624  | 0.84755052  | 2.73482696  |
| S    | -1.65459624 | -0.84755052 | 2.73482696  |
| S    | -1.65459624 | 0.84755052  | -2.73482696 |
| S    | 1.65459624  | -0.84755052 | -2.73482696 |
| C    | 1.47876760  | 2.53999905  | 0.82133525  |
| H    | 1.68516560  | 3.35764579  | 0.14009489  |
| C    | -1.47876760 | 2.53999905  | -0.82133525 |
| H    | -1.68516560 | 3.35764579  | -0.14009489 |
| C    | 1.47876760  | -2.53999905 | -0.82133525 |
| H    | 1.68516560  | -3.35764579 | -0.14009489 |
| C    | -1.47876760 | -2.53999905 | 0.82133525  |
| H    | -1.68516560 | -3.35764579 | 0.14009489  |
| C    | 0.45562153  | 1.57700489  | 0.58162890  |
| C    | -7.78351559 | 4.70887084  | -4.66040077 |
| H    | -7.20764951 | 4.28514967  | -5.47864980 |

---

|   |              |             |             |
|---|--------------|-------------|-------------|
| C | -5.86450039  | 4.24536208  | -3.10979455 |
| C | -11.34044360 | 5.79618170  | -3.96664446 |
| C | -7.19377734  | 4.83423420  | -3.39755132 |
| C | -0.45562153  | 1.57700489  | -0.58162890 |
| C | -18.68703696 | 2.85625033  | -1.89900073 |
| C | -19.54921196 | 0.59455328  | -0.44344451 |
| C | -9.87321988  | 5.62559284  | -3.83613266 |
| C | 14.16093236  | 5.67149622  | 3.76501651  |
| C | 13.43708001  | 6.68187117  | 3.12030749  |
| H | 13.95875273  | 7.40409402  | 2.49815621  |
| C | 12.05279270  | 6.74324171  | 3.22007998  |
| H | 11.51493832  | 7.51664151  | 2.67873734  |
| C | 11.34044360  | 5.79618170  | 3.96664446  |
| C | 12.07652323  | 4.86894803  | 4.71198619  |
| H | 11.55739199  | 4.10893430  | 5.28800060  |
| C | 13.45869087  | 4.80804195  | 4.61379400  |
| H | 13.98690438  | 4.00131381  | 5.11301761  |
| C | 7.19377734   | -4.83423420 | -3.39755132 |
| C | 7.93898729   | -5.43556021 | -2.37902457 |
| H | 7.50843180   | -5.53010794 | -1.38598806 |
| C | 9.25705251   | -5.81790480 | -2.59340106 |
| H | 9.84089885   | -6.19348142 | -1.75822173 |
| C | 9.87321988   | -5.62559284 | -3.83613266 |
| C | 9.09602625   | -5.10431925 | -4.87756308 |
| H | 9.52957403   | -4.98812774 | -5.86687396 |
| C | 7.78351559   | -4.70887084 | -4.66040077 |
| H | 7.20764951   | -4.28514967 | -5.47864980 |
| C | -17.82353892 | 3.92129823  | -2.46575742 |
| C | -2.23005671  | 2.27960063  | -1.93787838 |
| C | -19.78589284 | -1.88994316 | -0.03513795 |
| H | -20.25133079 | -2.02720873 | -1.00749421 |
| C | -4.89649372  | 4.91710093  | -2.35565789 |
| H | -5.08024806  | 5.94011966  | -2.03867565 |
| C | -19.54921196 | -0.59455328 | 0.44344451  |
| C | -19.02857722 | 0.46238008  | -1.73510822 |
| H | -18.82604489 | -0.52752783 | -2.13304206 |
| C | 11.34044360  | -5.79618170 | -3.96664446 |
| C | 12.05279270  | -6.74324171 | -3.22007998 |

---

---

|   |              |             |             |
|---|--------------|-------------|-------------|
| H | 11.51493832  | -7.51664151 | -2.67873734 |
| C | 13.43708001  | -6.68187117 | -3.12030749 |
| H | 13.95875273  | -7.40409402 | -2.49815621 |
| C | 14.16093236  | -5.67149622 | -3.76501651 |
| C | 13.45869087  | -4.80804195 | -4.61379400 |
| H | 13.98690438  | -4.00131381 | -5.11301761 |
| C | 12.07652323  | -4.86894803 | -4.71198619 |
| H | 11.55739199  | -4.10893430 | -5.28800060 |
| C | -18.68703696 | -2.85625033 | 1.89900073  |
| C | -14.16093236 | 5.67149622  | -3.76501651 |
| C | 7.19377734   | 4.83423420  | 3.39755132  |
| C | 7.78351559   | 4.70887084  | 4.66040077  |
| H | 7.20764951   | 4.28514967  | 5.47864980  |
| C | 9.09602625   | 5.10431925  | 4.87756308  |
| H | 9.52957403   | 4.98812774  | 5.86687396  |
| C | 9.87321988   | 5.62559284  | 3.83613266  |
| C | 9.25705251   | 5.81790480  | 2.59340106  |
| H | 9.84089885   | 6.19348142  | 1.75822173  |
| C | 7.93898729   | 5.43556021  | 2.37902457  |
| H | 7.50843180   | 5.53010794  | 1.38598806  |
| C | -4.39601034  | 2.31786432  | -3.18088734 |
| H | -4.23753184  | 1.28470315  | -3.47671007 |
| C | -17.04111882 | 4.68254132  | -1.59041202 |
| H | -17.22491657 | 4.62681492  | -0.52149199 |
| C | -15.92679970 | -5.37245175 | 2.04671905  |
| H | -15.26464110 | -5.83873687 | 1.32324216  |
| C | -7.93898729  | 5.43556021  | -2.37902457 |
| H | -7.50843180  | 5.53010794  | -1.38598806 |
| C | -9.87321988  | -5.62559284 | 3.83613266  |
| C | -19.36099653 | -3.00206878 | 0.68008947  |
| H | -19.49876830 | -3.99341663 | 0.25668065  |
| C | -12.07652323 | 4.86894803  | -4.71198619 |
| H | -11.55739199 | 4.10893430  | -5.28800060 |
| C | -15.92679970 | 5.37245175  | -2.04671905 |
| H | -15.26464110 | 5.83873687  | -1.32324216 |
| C | -9.25705251  | 5.81790480  | -2.59340106 |
| H | -9.84089885  | 6.19348142  | -1.75822173 |
| C | -0.43396902  | 0.58833841  | -1.53603133 |

---

---

|   |              |             |             |
|---|--------------|-------------|-------------|
| C | -19.36099653 | 3.00206878  | -0.68008947 |
| H | -19.49876830 | 3.99341663  | -0.25668065 |
| C | -12.05279270 | -6.74324171 | 3.22007998  |
| H | -11.51493832 | -7.51664151 | 2.67873734  |
| C | -2.23005671  | -2.27960063 | 1.93787838  |
| C | -15.55457383 | -5.32514352 | 3.39414756  |
| C | -18.60630499 | 1.57326751  | -2.45025675 |
| H | -18.08247498 | 1.42582717  | -3.38999948 |
| C | 5.86450039   | -4.24536208 | -3.10979455 |
| C | 5.58223121   | -2.94276719 | -3.53348075 |
| H | 6.32893704   | -2.39230060 | -4.09850858 |
| C | 4.39601034   | -2.31786432 | -3.18088734 |
| H | 4.23753184   | -1.28470315 | -3.47671007 |
| C | 3.43759337   | -2.97811304 | -2.40222133 |
| C | 3.69926767   | -4.29978033 | -2.01744936 |
| H | 2.95790342   | -4.85097974 | -1.44665261 |
| C | 4.89649372   | -4.91710093 | -2.35565789 |
| H | 5.08024806   | -5.94011966 | -2.03867565 |
| C | -19.78589284 | 1.88994316  | 0.03513795  |
| H | -20.25133079 | 2.02720873  | 1.00749421  |
| C | -5.86450039  | -4.24536208 | 3.10979455  |
| C | -13.45869087 | 4.80804195  | -4.61379400 |
| H | -13.98690438 | 4.00131381  | -5.11301761 |
| C | 0.43396902   | -0.58833841 | -1.53603133 |
| C | -13.43708001 | 6.68187117  | -3.12030749 |
| H | -13.95875273 | 7.40409402  | -2.49815621 |
| C | -9.25705251  | -5.81790480 | 2.59340106  |
| H | -9.84089885  | -6.19348142 | 1.75822173  |
| C | -13.43708001 | -6.68187117 | 3.12030749  |
| H | -13.95875273 | -7.40409402 | 2.49815621  |
| C | -12.07652323 | -4.86894803 | 4.71198619  |
| H | -11.55739199 | -4.10893430 | 5.28800060  |
| C | 2.23005671   | -2.27960063 | -1.93787838 |
| C | -19.02857722 | -0.46238008 | 1.73510822  |
| H | -18.82604489 | 0.52752783  | 2.13304206  |
| C | -7.19377734  | -4.83423420 | 3.39755132  |
| C | -3.43759337  | -2.97811304 | 2.40222133  |
| C | -7.93898729  | -5.43556021 | 2.37902457  |

---



---

|   |              |             |             |
|---|--------------|-------------|-------------|
| H | -7.50843180  | -5.53010794 | 1.38598806  |
| C | -18.60630499 | -1.57326751 | 2.45025675  |
| H | -18.08247498 | -1.42582717 | 3.38999948  |
| C | -12.05279270 | 6.74324171  | -3.22007998 |
| H | -11.51493832 | 7.51664151  | -2.67873734 |
| C | -17.54820911 | -4.01476663 | 3.83587665  |
| H | -18.17864162 | -3.48915766 | 4.54807218  |
| C | -5.58223121  | -2.94276719 | 3.53348075  |
| H | -6.32893704  | -2.39230060 | 4.09850858  |
| C | -9.09602625  | -5.10431925 | 4.87756308  |
| H | -9.52957403  | -4.98812774 | 5.86687396  |
| C | -4.89649372  | -4.91710093 | 2.35565789  |
| H | -5.08024806  | -5.94011966 | 2.03867565  |
| C | -4.39601034  | -2.31786432 | 3.18088734  |
| H | -4.23753184  | -1.28470315 | 3.47671007  |
| C | -15.55457383 | 5.32514352  | -3.39414756 |
| C | -9.09602625  | 5.10431925  | -4.87756308 |
| H | -9.52957403  | 4.98812774  | -5.86687396 |
| C | 2.23005671   | 2.27960063  | 1.93787838  |
| C | -3.43759337  | 2.97811304  | -2.40222133 |
| C | -0.43396902  | -0.58833841 | 1.53603133  |
| C | -5.58223121  | 2.94276719  | -3.53348075 |
| H | -6.32893704  | 2.39230060  | -4.09850858 |
| C | 0.43396902   | 0.58833841  | 1.53603133  |
| C | -11.34044360 | -5.79618170 | 3.96664446  |
| C | 17.04111882  | 4.68254132  | 1.59041202  |
| H | 17.22491657  | 4.62681492  | 0.52149199  |
| C | 15.92679970  | 5.37245175  | 2.04671905  |
| H | 15.26464110  | 5.83873687  | 1.32324216  |
| C | 15.55457383  | 5.32514352  | 3.39414756  |
| C | 16.43290752  | 4.70509928  | 4.29195638  |
| H | 16.20804968  | 4.71115870  | 5.35508807  |
| C | 17.54820911  | 4.01476663  | 3.83587665  |
| H | 18.17864162  | 3.48915766  | 4.54807218  |
| C | 17.82353892  | 3.92129823  | 2.46575742  |
| C | 0.45562153   | -1.57700489 | -0.58162890 |
| C | -0.45562153  | -1.57700489 | 0.58162890  |
| C | -3.69926767  | 4.29978033  | -2.01744936 |

---

---

|   |              |             |             |
|---|--------------|-------------|-------------|
| H | -2.95790342  | 4.85097974  | -1.44665261 |
| C | 5.86450039   | 4.24536208  | 3.10979455  |
| C | 4.89649372   | 4.91710093  | 2.35565789  |
| H | 5.08024806   | 5.94011966  | 2.03867565  |
| C | 3.69926767   | 4.29978033  | 2.01744936  |
| H | 2.95790342   | 4.85097974  | 1.44665261  |
| C | 3.43759337   | 2.97811304  | 2.40222133  |
| C | 4.39601034   | 2.31786432  | 3.18088734  |
| H | 4.23753184   | 1.28470315  | 3.47671007  |
| C | 5.58223121   | 2.94276719  | 3.53348075  |
| H | 6.32893704   | 2.39230060  | 4.09850858  |
| C | -17.82353892 | -3.92129823 | 2.46575742  |
| C | -17.04111882 | -4.68254132 | 1.59041202  |
| H | -17.22491657 | -4.62681492 | 0.52149199  |
| C | -13.45869087 | -4.80804195 | 4.61379400  |
| H | -13.98690438 | -4.00131381 | 5.11301761  |
| C | -17.54820911 | 4.01476663  | -3.83587665 |
| H | -18.17864162 | 3.48915766  | -4.54807218 |
| C | -14.16093236 | -5.67149622 | 3.76501651  |
| C | -16.43290752 | 4.70509928  | -4.29195638 |
| H | -16.20804968 | 4.71115870  | -5.35508807 |
| C | -16.43290752 | -4.70509928 | 4.29195638  |
| H | -16.20804968 | -4.71115870 | 5.35508807  |
| C | -3.69926767  | -4.29978033 | 2.01744936  |
| H | -2.95790342  | -4.85097974 | 1.44665261  |
| C | 15.92679970  | -5.37245175 | -2.04671905 |
| H | 15.26464110  | -5.83873687 | -1.32324216 |
| C | 17.04111882  | -4.68254132 | -1.59041202 |
| H | 17.22491657  | -4.62681492 | -0.52149199 |
| C | 17.82353892  | -3.92129823 | -2.46575742 |
| C | 17.54820911  | -4.01476663 | -3.83587665 |
| H | 18.17864162  | -3.48915766 | -4.54807218 |
| C | 16.43290752  | -4.70509928 | -4.29195638 |
| H | 16.20804968  | -4.71115870 | -5.35508807 |
| C | 15.55457383  | -5.32514352 | -3.39414756 |
| C | -7.78351559  | -4.70887084 | 4.66040077  |
| H | -7.20764951  | -4.28514967 | 5.47864980  |
| C | 19.78589284  | 1.88994316  | -0.03513795 |

---

|   |              |             |             |
|---|--------------|-------------|-------------|
| H | 20.25133079  | 2.02720873  | -1.00749421 |
| C | 19.54921196  | 0.59455328  | 0.44344451  |
| C | 19.02857722  | 0.46238008  | 1.73510822  |
| H | 18.82604489  | -0.52752783 | 2.13304206  |
| C | 18.60630499  | 1.57326751  | 2.45025675  |
| H | 18.08247498  | 1.42582717  | 3.38999948  |
| C | 18.68703696  | 2.85625033  | 1.89900073  |
| C | 19.36099653  | 3.00206878  | 0.68008947  |
| H | 19.49876830  | 3.99341663  | 0.25668065  |
| C | 18.60630499  | -1.57326751 | -2.45025675 |
| H | 18.08247498  | -1.42582717 | -3.38999948 |
| C | 18.68703696  | -2.85625033 | -1.89900073 |
| C | 19.36099653  | -3.00206878 | -0.68008947 |
| H | 19.49876830  | -3.99341663 | -0.25668065 |
| C | 19.78589284  | -1.88994316 | 0.03513795  |
| H | 20.25133079  | -2.02720873 | 1.00749421  |
| C | 19.54921196  | -0.59455328 | -0.44344451 |
| C | 19.02857722  | -0.46238008 | -1.73510822 |
| H | 18.82604489  | 0.52752783  | -2.13304206 |
| C | -11.95709279 | -3.06682207 | 1.93818199  |
| C | -10.74863336 | -2.90614972 | 1.84302600  |
| C | -9.56833938  | -2.35613865 | 1.49933855  |
| C | -8.75920615  | -1.58037528 | 1.01004654  |
| C | -8.29234143  | -0.51500724 | 0.32956427  |
| C | -8.29234143  | 0.51500724  | -0.32956427 |
| C | -8.75920615  | 1.58037528  | -1.01004654 |
| C | -9.56833938  | 2.35613865  | -1.49933855 |
| C | -10.74863336 | 2.90614972  | -1.84302600 |
| C | -11.95709279 | 3.06682207  | -1.93818199 |
| C | -13.28492107 | 2.87775302  | -1.82022523 |
| C | -14.35830230 | 2.38262788  | -1.50617124 |
| C | -15.25579321 | 1.53517159  | -0.96677609 |
| C | -15.69927565 | 0.57118641  | -0.35762013 |
| C | -15.69927565 | -0.57118641 | 0.35762013  |
| C | -15.25579321 | -1.53517159 | 0.96677609  |
| C | -14.35830230 | -2.38262788 | 1.50617124  |
| C | -13.28492107 | -2.87775302 | 1.82022523  |
| C | 11.95709279  | -3.06682207 | -1.93818199 |

|   |             |             |             |
|---|-------------|-------------|-------------|
| C | 13.28492107 | -2.87775302 | -1.82022523 |
| C | 14.35830230 | -2.38262788 | -1.50617124 |
| C | 15.25579321 | -1.53517159 | -0.96677609 |
| C | 15.69927565 | -0.57118641 | -0.35762013 |
| C | 15.69927565 | 0.57118641  | 0.35762013  |
| C | 15.25579321 | 1.53517159  | 0.96677609  |
| C | 14.35830230 | 2.38262788  | 1.50617124  |
| C | 13.28492107 | 2.87775302  | 1.82022523  |
| C | 11.95709279 | 3.06682207  | 1.93818199  |
| C | 10.74863336 | 2.90614972  | 1.84302600  |
| C | 9.56833938  | 2.35613865  | 1.49933855  |
| C | 8.75920615  | 1.58037528  | 1.01004654  |
| C | 8.29234143  | 0.51500724  | 0.32956427  |
| C | 8.29234143  | -0.51500724 | -0.32956427 |
| C | 8.75920615  | -1.58037528 | -1.01004654 |
| C | 9.56833938  | -2.35613865 | -1.49933855 |
| C | 10.74863336 | -2.90614972 | -1.84302600 |

---

C<sub>18</sub>@OPPT<sup>S</sup> (charge = 0, spin multiplicity = 1)

| atom | <i>x</i>     | <i>y</i>    | <i>z</i>    |
|------|--------------|-------------|-------------|
| S    | -0.32514823  | -0.91505722 | 2.76098159  |
| S    | 2.84327108   | 0.88907024  | 2.81944114  |
| S    | 2.84304291   | -0.89066470 | -2.81840707 |
| S    | -0.32557788  | 0.91301755  | -2.75959793 |
| C    | -0.15748280  | -2.58128866 | 0.82654471  |
| H    | -0.36071790  | -3.39528697 | 0.13992335  |
| C    | 2.67428064   | -2.59978742 | -0.92125300 |
| H    | 2.86536940   | -3.43949636 | -0.26277132 |
| C    | -0.15790229  | 2.57930169  | -0.82520396 |
| H    | -0.36115799  | 3.39331098  | -0.13860031 |
| C    | 2.67397133   | 2.59817903  | 0.92232072  |
| H    | 2.86482718   | 3.43792842  | 0.26382277  |
| C    | 0.83878454   | -1.59325248 | 0.57177847  |
| C    | 1.71807742   | -1.58737230 | -0.61495534 |
| H    | -12.79141793 | -5.75678102 | 3.77867736  |
| C    | -12.07263828 | -6.76334171 | 3.12148782  |

---

|   |              |             |             |
|---|--------------|-------------|-------------|
| C | -12.59770789 | -7.47757859 | 2.49307359  |
| C | -10.68880807 | -6.83111106 | 3.21603841  |
| C | -10.15548456 | -7.60125176 | 2.66562068  |
| C | -9.97008170  | -5.89633734 | 3.97279588  |
| C | -10.70112716 | -4.97633170 | 4.73208454  |
| C | -10.17781145 | -4.22779509 | 5.31946952  |
| C | -12.08330739 | -4.90898658 | 4.63761286  |
| C | -12.60488692 | -4.10445355 | 5.14714537  |
| H | -5.80876284  | 4.97249274  | -3.43942547 |
| C | -6.55562223  | 5.55005390  | -2.40846553 |
| H | -6.12282964  | 5.63134982  | -1.41517702 |
| C | -7.87830262  | 5.92236772  | -2.61029101 |
| C | -8.46161528  | 6.27725732  | -1.76562217 |
| H | -8.49912437  | 5.74093343  | -3.85156955 |
| C | -7.72042729  | 5.24931695  | -4.90644532 |
| H | -8.15762655  | 5.14591959  | -5.89561099 |
| C | -6.40229185  | 4.86581964  | -4.70263610 |
| C | -5.82573075  | 4.46445348  | -5.53162451 |
| H | 3.37744537   | -2.36771178 | -2.07461407 |
| C | -9.96961370  | 5.89633744  | -3.97328805 |
| H | -10.68811421 | 6.83147037  | -3.21675564 |
| C | -10.15460713 | 7.60153683  | -2.66641333 |
| C | -12.07196712 | 6.76412886  | -3.12228519 |
| H | -12.59686491 | 7.47861456  | -2.49401027 |
| C | -12.79100216 | 5.75766924  | -3.77935752 |
| H | -12.08309477 | 4.90958442  | -4.63817043 |
| C | -12.60486777 | 4.10513239  | -5.14763080 |
| C | -10.70088914 | 4.97649306  | -4.73254455 |
| C | -10.17777658 | 4.22768959  | -5.31976946 |
| H | -5.80876178  | -4.97401780 | 3.44003213  |
| C | -6.40243685  | -4.86768101 | 4.70320040  |
| H | -5.82584145  | -4.46692479 | 5.53246024  |
| C | -7.72077570  | -5.25070142 | 4.90662476  |
| C | -8.15810863  | -5.14753846 | 5.89575699  |
| H | -8.49950575  | -5.74151230 | 3.85140294  |
| C | -7.87856138  | -5.92267544 | 2.61014650  |
| C | -8.46189818  | -6.27696257 | 1.76524035  |
| H | -6.55570076  | -5.55080428 | 2.40869175  |

---

---

|   |              |             |             |
|---|--------------|-------------|-------------|
| C | -6.12278916  | -5.63182497 | 1.41543226  |
| H | 1.70117537   | -0.58368815 | -1.55333145 |
| C | 3.37732967   | 2.36621310  | 2.07558534  |
| C | -4.47872005  | 4.37955231  | -3.16162891 |
| H | -4.18809712  | 3.09362571  | -3.62847150 |
| C | -4.92254282  | 2.56535838  | -4.22955281 |
| H | -3.01290220  | 2.45109421  | -3.27066091 |
| C | -2.85238586  | 1.42866666  | -3.60065810 |
| C | -2.07295403  | 3.07611002  | -2.44221888 |
| C | -2.33729508  | 4.38624275  | -2.02084071 |
| C | -1.60895669  | 4.91367867  | -1.41209470 |
| H | -3.52352645  | 5.02084772  | -2.36532780 |
| C | -3.71027951  | 6.03259508  | -2.01563811 |
| H | 0.86113289   | 0.61207956  | -1.53428765 |
| C | -0.88822582  | 2.34952906  | -1.96142898 |
| C | -0.88774586  | -2.35160164 | 1.96282810  |
| H | 1.70129329   | 0.58190954  | 1.55451248  |
| C | 0.86142758   | -0.61398488 | 1.53557358  |
| H | -15.67084068 | -4.76608727 | 1.59762625  |
| C | -15.85453911 | -4.72685597 | 0.52808081  |
| H | -14.56558595 | -5.46577285 | 2.06184223  |
| C | -13.91705515 | -5.95750160 | 1.34278422  |
| H | -14.18256883 | -5.39744474 | 3.40590182  |
| C | -15.04999041 | -4.74897133 | 4.29496259  |
| H | -14.82435246 | -4.74115746 | 5.35783455  |
| C | -16.15444323 | -4.04745758 | 3.83002789  |
| H | -16.77231672 | -3.49967649 | 4.53646050  |
| C | -16.43274135 | -3.96987106 | 2.45918319  |
| C | 0.83847472   | 1.59135699  | -0.57049858 |
| H | 1.71789979   | 1.58560447  | 0.61613850  |
| C | -4.47849473  | -4.38139489 | 3.16262791  |
| H | -3.52347769  | -5.02259280 | 2.36603540  |
| C | -3.71049577  | -6.03414176 | 2.01591373  |
| H | -2.33712413  | -4.38811774 | 2.02173484  |
| C | -1.60896785  | -4.91547188 | 1.41270155  |
| H | -2.07247231  | -3.07820153 | 2.44359807  |
| C | -3.01219072  | -2.45335098 | 3.27242461  |
| C | -2.85142513  | -1.43110330 | 3.60285741  |

---

---

|   |              |             |             |
|---|--------------|-------------|-------------|
| H | -4.18750913  | -3.09576067 | 3.63004639  |
| C | -4.92178695  | -2.56756856 | 4.23139857  |
| H | -14.56531649 | 5.46738493  | -2.06253525 |
| C | -13.91675537 | 5.95917486  | -1.34354585 |
| C | -15.67065087 | 4.76788919  | -1.59821134 |
| C | -15.85435967 | 4.72887635  | -0.52865963 |
| H | -16.43256096 | 3.97153407  | -2.45962348 |
| C | -16.15426188 | 4.04888835  | -3.83048599 |
| C | -16.77218549 | 3.50105938  | -4.53683658 |
| H | -15.04973984 | 4.75020647  | -4.29552640 |
| C | -14.82409205 | 4.74218751  | -5.35839442 |
| H | -14.18224709 | 5.39871847  | -3.40655783 |
| C | -18.33380454 | -1.88944140 | -0.05847934 |
| C | -18.78960406 | -2.01559343 | -1.03687578 |
| H | -18.09907347 | -0.59974652 | 0.43581622  |
| C | -17.58791529 | -0.48609650 | 1.73334768  |
| H | -17.38205597 | 0.49777219  | 2.14410466  |
| C | -17.17979728 | -1.60725037 | 2.44155947  |
| H | -16.66547234 | -1.47094773 | 3.38809308  |
| C | -17.26743316 | -2.88687546 | 1.88104500  |
| C | -17.92565319 | -3.01242779 | 0.65086956  |
| H | -18.06918014 | -3.99763982 | 0.21534490  |
| C | -17.17987152 | 1.60898961  | -2.44189535 |
| C | -16.66566840 | 1.47261574  | -3.38848359 |
| H | -17.26727557 | 2.88862168  | -1.88135993 |
| C | -17.92534563 | 3.01424181  | -0.65110769 |
| H | -18.06871452 | 3.99946632  | -0.21555949 |
| C | -18.33356318 | 1.89129963  | 0.05827146  |
| H | -18.78922829 | 2.01749876  | 1.03672440  |
| C | -18.09906982 | 0.60158114  | -0.43607453 |
| H | -17.58809277 | 0.48788471  | -1.73366987 |
| C | -17.38241787 | -0.49600492 | -2.14447040 |
| C | -12.09050012 | 2.99554685  | -1.73828515 |
| H | -13.26158419 | 2.41769978  | -1.41436289 |
| C | -14.05622152 | 1.61200764  | -0.95074901 |
| C | -14.52947092 | 0.52743866  | -0.31042748 |
| C | -14.52780560 | -0.52552790 | 0.31141394  |
| H | -14.05771411 | -1.61135409 | 0.95192547  |

---

---

|   |              |             |             |
|---|--------------|-------------|-------------|
| C | -13.26058786 | -2.41556298 | 1.41384230  |
| H | -12.09109995 | -2.99624509 | 1.73847452  |
| C | -10.88811332 | -3.18856604 | 1.84555142  |
| H | -9.56184442  | -2.98641082 | 1.73932706  |
| C | -8.49633968  | -2.46380614 | 1.44325327  |
| H | -7.63164490  | -1.57166305 | 0.92402974  |
| C | -7.21528618  | -0.58036082 | 0.34028392  |
| H | -7.21374690  | 0.57956280  | -0.34424925 |
| C | -7.63300795  | 1.57013702  | -0.92716395 |
| H | -8.49527572  | 2.46435037  | -1.44682488 |
| C | -9.56235751  | 2.98498688  | -1.74076409 |
| H | -10.88808495 | 3.19021655  | -1.84766833 |
| C | 15.19129581  | -5.61321549 | -3.94782285 |
| H | 14.50713070  | -6.68837825 | -3.36765933 |
| C | 15.05441385  | -7.41555166 | -2.77366485 |
| C | 13.12873181  | -6.81271818 | -3.49806652 |
| H | 12.61933367  | -7.63786575 | -3.00747867 |
| C | 12.38364003  | -5.86644057 | -4.21261542 |
| C | 13.08489424  | -4.86267820 | -4.88972563 |
| C | 12.53672990  | -4.10501832 | -5.44198326 |
| C | 14.46060999  | -4.73904937 | -4.76052202 |
| H | 14.95927980  | -3.88631954 | -5.21190005 |
| C | 8.19004580   | 5.08129611  | 3.72388656  |
| C | 8.93930014   | 5.66323153  | 2.69627665  |
| C | 8.50051129   | 5.76757846  | 1.70781072  |
| H | 10.27233256  | 6.00204483  | 2.88922309  |
| C | 10.85513398  | 6.36002715  | 2.04539751  |
| H | 10.90393603  | 5.77840685  | 4.11808008  |
| C | 10.12267742  | 5.29646238  | 5.17553400  |
| C | 10.57033402  | 5.16324041  | 6.15663126  |
| H | 8.79189586   | 4.95014548  | 4.98102214  |
| C | 8.21589839   | 4.54946698  | 5.81085796  |
| H | 12.38305720  | 5.86674458  | 4.21268999  |
| C | 13.12786375  | 6.81320407  | 3.49808433  |
| C | 12.61823187  | 7.63825744  | 3.00758076  |
| C | 14.50627317  | 6.68916027  | 3.36750854  |
| C | 15.05333174  | 7.41646704  | 2.77347050  |
| H | 15.19073441  | 5.61412420  | 3.94755701  |

---



---

|   |             |             |             |
|---|-------------|-------------|-------------|
| C | 14.46033148 | 4.73978039  | 4.76031942  |
| C | 14.95923609 | 3.88714282  | 5.21161246  |
| H | 13.08460441 | 4.86311192  | 4.88968897  |
| C | 12.53666603 | 4.10531821  | 5.44198728  |
| H | 8.19051629  | -5.08187189 | -3.72337869 |
| C | 8.79220167  | -4.95063168 | -4.98058396 |
| C | 8.21602957  | -4.55009709 | -5.81036789 |
| H | 10.12303531 | -5.29667267 | -5.17522904 |
| C | 10.57055834 | -5.16338550 | -6.15637826 |
| H | 10.90451035 | -5.77841923 | -4.11784472 |
| C | 10.27308685 | -6.00215807 | -2.88891358 |
| C | 10.85605565 | -6.35999228 | -2.04514088 |
| H | 8.94000342  | -5.66362095 | -2.69583316 |
| C | 8.50134141  | -5.76803302 | -1.70731777 |
| H | 6.86449331  | 4.48325259  | 3.43059221  |
| C | 6.57380868  | 3.19740130  | 3.89863727  |
| H | 7.29113839  | 2.68539141  | 4.53338521  |
| C | 5.42808993  | 2.52891397  | 3.49510913  |
| C | 5.27394846  | 1.50661913  | 3.82876291  |
| H | 4.51668540  | 3.12472672  | 2.61496683  |
| C | 4.77094496  | 4.44005806  | 2.20236994  |
| H | 4.06137280  | 4.94960408  | 1.55738019  |
| C | 5.92736612  | 5.10149104  | 2.59484617  |
| H | 6.10777122  | 6.11418088  | 2.24447849  |
| C | 18.04460054 | -4.62118269 | -1.72624504 |
| H | 18.22587799 | -4.59358743 | -0.65576360 |
| C | 16.93550324 | -5.30547527 | -2.20383428 |
| H | 16.27592047 | -5.80028891 | -1.49679338 |
| C | 16.57156180 | -5.23362650 | -3.55269144 |
| C | 17.44829018 | -4.58200560 | -4.42951423 |
| H | 17.22813058 | -4.56408328 | -5.49361890 |
| C | 18.55946662 | -3.89794328 | -3.95157978 |
| H | 19.19075063 | -3.35341833 | -4.64881569 |
| C | 18.83259611 | -3.83979566 | -2.57905304 |
| C | 6.86487458  | -4.48408887 | -3.42995525 |
| H | 5.92795081  | -5.10250361 | -2.59411240 |
| C | 6.10859038  | -6.11515409 | -2.24375160 |
| H | 4.77143842  | -4.44129253 | -2.20152872 |

---

|   |             |             |             |
|---|-------------|-------------|-------------|
| C | 4.06202674  | -4.95096909 | -1.55646556 |
| C | 4.51688396  | -3.12601516 | -2.61411075 |
| H | 5.42808564  | -2.53002886 | -3.49434550 |
| C | 5.27371523  | -1.50776655 | -3.82799198 |
| H | 6.57389398  | -3.19829716 | -3.89798137 |
| C | 7.29106166  | -2.68615310 | -4.53280418 |
| C | 16.93477218 | 5.30677631  | 2.20333382  |
| H | 16.27499293 | 5.80146808  | 1.49639106  |
| C | 18.04394024 | 4.62271262  | 1.72558170  |
| H | 18.22507480 | 4.59516963  | 0.65507470  |
| C | 18.83220828 | 3.84146871  | 2.57826876  |
| C | 18.55925717 | 3.89954332  | 3.95083453  |
| H | 19.19074539 | 3.35513409  | 4.64797582  |
| C | 17.44800749 | 4.58337327  | 4.42893195  |
| H | 17.22799554 | 4.56538823  | 5.49306617  |
| C | 16.57102796 | 5.23483051  | 3.55223875  |
| C | 20.82195775 | -1.89208459 | -0.02522430 |
| H | 21.28967609 | -2.06290384 | 0.94081141  |
| C | 20.59258381 | -0.58089737 | -0.46242364 |
| C | 20.06952083 | -0.40960749 | -1.74906799 |
| C | 19.87522759 | 0.59261670  | -2.11934507 |
| C | 19.63506017 | -1.49601083 | -2.49469692 |
| C | 19.11338878 | -1.31669481 | -3.43021158 |
| C | 19.70526422 | -2.79614926 | -1.98219742 |
| C | 20.38476220 | -2.98039033 | -0.77120125 |
| C | 20.51734020 | -3.98434172 | -0.37657516 |
| C | 19.63513410 | 1.49784552  | 2.49378625  |
| C | 19.11364193 | 1.31842212  | 3.42938010  |
| C | 19.70499582 | 2.79799952  | 1.98127777  |
| C | 20.38426954 | 2.98237946  | 0.77017721  |
| C | 20.51658210 | 3.98635803  | 0.37553105  |
| C | 20.82157119 | 1.89416383  | 0.02413149  |
| C | 21.28910532 | 2.06507979  | -0.94197633 |
| C | 20.59253359 | 0.58292965  | 0.46136513  |
| C | 20.06970277 | 0.41153165  | 1.74808979  |
| C | 19.87567215 | -0.59073247 | 2.11839624  |

| 2C <sub>18</sub> @OPP <sup>TS</sup> (charge = 0, spin multiplicity = 1) |              |             |             |
|-------------------------------------------------------------------------|--------------|-------------|-------------|
| atom                                                                    | x            | y           | z           |
| S                                                                       | -1.64083093  | 0.91181485  | -2.73807244 |
| S                                                                       | 1.63943089   | -0.80518650 | -2.75190002 |
| S                                                                       | 1.63907906   | 0.80557986  | 2.75395591  |
| S                                                                       | -1.64080525  | -0.91218448 | 2.73991798  |
| C                                                                       | -1.46700361  | 2.57164519  | -0.79633960 |
| H                                                                       | -1.66971929  | 3.38195056  | -0.10529783 |
| C                                                                       | 1.46478461   | 2.52962326  | 0.86928051  |
| H                                                                       | 1.67127884   | 3.35889729  | 0.20225465  |
| C                                                                       | -1.46647550  | -2.57195648 | 0.79818476  |
| H                                                                       | -1.66895442  | -3.38228812 | 0.10710557  |
| C                                                                       | 1.46540977   | -2.52930460 | -0.86726160 |
| H                                                                       | 1.67205848   | -3.35856191 | -0.20026109 |
| C                                                                       | -0.46039802  | 1.59077975  | -0.55838135 |
| C                                                                       | 0.44431152   | 1.56858711  | 0.60985999  |
| H                                                                       | -14.10880395 | 5.77513431  | -3.74656787 |
| C                                                                       | -13.38876808 | 6.77824228  | -3.08549587 |
| C                                                                       | -13.91320597 | 7.49174160  | -2.45570169 |
| C                                                                       | -12.00462434 | 6.84309036  | -3.17771106 |
| C                                                                       | -11.47064724 | 7.61064392  | -2.62434063 |
| C                                                                       | -11.28670015 | 5.90826367  | -3.93525889 |
| C                                                                       | -12.01885259 | 4.99247685  | -4.69862646 |
| C                                                                       | -11.49671621 | 4.24375790  | -5.28676973 |
| C                                                                       | -13.40133684 | 4.92847564  | -4.60709381 |
| C                                                                       | -13.92396737 | 4.12666082  | -5.11982244 |
| H                                                                       | -7.13126251  | -4.96692630 | 3.39083032  |
| C                                                                       | -7.87665359  | -5.55176891 | 2.36299686  |
| H                                                                       | -7.44485189  | -5.63433051 | 1.36936953  |
| C                                                                       | -9.19717197  | -5.93008064 | 2.56819012  |
| C                                                                       | -9.77993794  | -6.29014062 | 1.72535595  |
| H                                                                       | -9.81697818  | -5.74807473 | 3.80993544  |
| C                                                                       | -9.03878515  | -5.24966768 | 4.86204845  |
| H                                                                       | -9.47439804  | -5.14593057 | 5.85185401  |
| C                                                                       | -7.72321288  | -4.85960003 | 4.65472724  |
| C                                                                       | -7.14724430  | -4.45274403 | 5.48144131  |
| H                                                                       | 2.21371575   | 2.25214635  | 1.98277126  |
| C                                                                       | -11.28674450 | -5.90846052 | 3.93474589  |

|   |              |             |             |
|---|--------------|-------------|-------------|
| H | -12.00465228 | -6.84308317 | 3.17693359  |
| C | -11.47066444 | -7.61059306 | 2.62351207  |
| C | -13.38878073 | -6.77810179 | 3.08455903  |
| H | -13.91320136 | -7.49146288 | 2.45459431  |
| C | -14.10881427 | -5.77504356 | 3.74570633  |
| H | -13.40137568 | -4.92854735 | 4.60641839  |
| C | -13.92400605 | -4.12676464 | 5.11919832  |
| C | -12.01890837 | -4.99269411 | 4.69812934  |
| C | -11.49676579 | -4.24413124 | 5.28646659  |
| H | -7.13149937  | 4.96614488  | -3.39017164 |
| C | -7.72323685  | 4.85842135  | -4.65413528 |
| H | -7.14718842  | 4.45112777  | -5.48057806 |
| C | -9.03868503  | 5.24867993  | -4.86186359 |
| C | -9.47411461  | 5.14465450  | -5.85171864 |
| H | -9.81698623  | 5.74765403  | -3.81009624 |
| C | -9.19738126  | 5.93001058  | -2.56830074 |
| C | -9.78022936  | 6.29050035  | -1.72570847 |
| H | -7.87697020  | 5.55153745  | -2.36271215 |
| C | -7.44533519  | 5.63441725  | -1.36903890 |
| H | 0.42218492   | 0.56375978  | 1.54685442  |
| C | 2.21432744   | -2.25164345 | -1.98071372 |
| C | -5.80373423  | -4.36938240 | 3.11092508  |
| H | -5.51931902  | -3.07985515 | 3.57170747  |
| C | -6.25835580  | -2.55052814 | 4.16622237  |
| H | -4.34349382  | -2.43655300 | 3.21737267  |
| C | -4.18657780  | -1.41217718 | 3.54306528  |
| C | -3.39667597  | -3.06450735 | 2.39903293  |
| C | -3.65661752  | -4.37659504 | 1.98109964  |
| C | -2.92318397  | -4.90555005 | 1.37982667  |
| H | -4.84361549  | -5.01196098 | 2.32172912  |
| C | -5.02629096  | -6.02589670 | 1.97622654  |
| H | -0.43985207  | -0.61679172 | 1.52923522  |
| C | -2.20592999  | -2.34096361 | 1.92868065  |
| C | -2.20631308  | 2.34048077  | -1.92689351 |
| H | 0.42241798   | -0.56365285 | -1.54485875 |
| C | -0.43990368  | 0.61669256  | -1.52729500 |
| H | -16.98931898 | 4.77622905  | -1.57137525 |
| C | -17.17295560 | 4.73126268  | -0.50204047 |

|   |              |             |             |
|---|--------------|-------------|-------------|
| H | -15.88375277 | 5.47791011  | -2.03187101 |
| C | -15.23484652 | 5.96542809  | -1.31027459 |
| H | -15.50073438 | 5.41634457  | -3.37624252 |
| C | -16.36858290 | 4.77332763  | -4.26882626 |
| H | -16.14277349 | 4.77095396  | -5.33169277 |
| C | -17.47339418 | 4.06994392  | -3.80763779 |
| H | -18.09158365 | 3.52627368  | -4.51696453 |
| C | -17.75147350 | 3.98489010  | -2.43718135 |
| C | -0.46005676  | -1.59087907 | 0.56031498  |
| H | 0.44472121   | -1.56848436 | -0.60787125 |
| C | -5.80408724  | 4.36854375  | -3.10983955 |
| H | -4.84395154  | 5.01138599  | -2.32087988 |
| C | -5.02656676  | 6.02548214  | -1.97581603 |
| H | -3.65698880  | 4.37609423  | -1.97998482 |
| C | -2.92350750  | 4.90525284  | -1.37894816 |
| H | -3.39710982  | 3.06383354  | -2.39740664 |
| C | -4.34398384  | 2.43556447  | -3.21543998 |
| C | -4.18711657  | 1.41103836  | -3.54068351 |
| H | -5.51977290  | 3.07878667  | -3.57004309 |
| C | -6.25884878  | 2.54925750  | -4.16433040 |
| H | -15.88360211 | -5.47753397 | 2.03089504  |
| C | -15.23462575 | -5.96494151 | 1.30928748  |
| C | -16.98916859 | -4.77585161 | 1.57041010  |
| C | -17.17274107 | -4.73076157 | 0.50106976  |
| H | -17.75145005 | -3.98468551 | 2.43626726  |
| C | -17.47344239 | -4.06986804 | 3.80672701  |
| C | -18.09170055 | -3.52630277 | 4.51607502  |
| H | -16.36862576 | -4.77325833 | 4.26790625  |
| C | -16.14288907 | -4.77100145 | 5.33078846  |
| H | -15.50069829 | -5.41614782 | 3.37531048  |
| C | -19.65224282 | 1.89007373  | 0.06883053  |
| C | -20.10797620 | 2.01057750  | 1.04797066  |
| H | -19.41753859 | 0.60325543  | -0.43290996 |
| C | -18.90639723 | 0.49704914  | -1.73107158 |
| H | -18.70052167 | -0.48445293 | -2.14744701 |
| C | -18.49834172 | 1.62224789  | -2.43284489 |
| H | -17.98403774 | 1.49138977  | -3.38015255 |
| C | -18.58605703 | 2.89864606  | -1.86501774 |

|   |              |             |             |
|---|--------------|-------------|-------------|
| C | -19.24416557 | 3.01713101  | -0.63407765 |
| H | -19.38768039 | 3.99983205  | -0.19290758 |
| C | -18.49841729 | -1.62207692 | 2.43198687  |
| C | -17.98414135 | -1.49122736 | 3.37931182  |
| H | -18.58609445 | -2.89846891 | 1.86414146  |
| C | -19.24417858 | -3.01695674 | 0.63319037  |
| H | -19.38766161 | -3.99965716 | 0.19200837  |
| C | -19.65224531 | -1.88989955 | -0.06972401 |
| H | -20.10795556 | -2.01040165 | -1.04887505 |
| C | -19.41754811 | -0.60308160 | 0.43202130  |
| H | -18.90644629 | -0.49687542 | 1.73019982  |
| C | -18.70058581 | 0.48462653  | 2.14658256  |
| C | -13.40481279 | -3.00409992 | 1.71798604  |
| H | -14.57569471 | -2.42384905 | 1.39764671  |
| C | -15.37397854 | -1.61766910 | 0.94115242  |
| C | -15.84576911 | -0.52837321 | 0.30778566  |
| C | -15.84695754 | 0.52860170  | -0.30724759 |
| H | -15.37335316 | 1.61718797  | -0.94048366 |
| C | -14.57684245 | 2.42450125  | -1.39806723 |
| H | -13.40505917 | 3.00315878  | -1.71798757 |
| C | -12.20230655 | 3.19662760  | -1.82577823 |
| H | -10.87641670 | 2.99138457  | -1.72136409 |
| C | -9.80841170  | 2.47025283  | -1.43174292 |
| H | -8.94355277  | 1.57502697  | -0.91819847 |
| C | -8.52324961  | 0.58173919  | -0.34065484 |
| H | -8.52412545  | -0.58173840 | 0.33782791  |
| C | -8.94237011  | -1.57557219 | 0.91591854  |
| H | -9.80858633  | -2.46964366 | 1.42921058  |
| C | -10.87546296 | -2.99226814 | 1.72024085  |
| H | -12.20165370 | -3.19581375 | 1.82427553  |
| C | 7.76685037   | -4.63447264 | -4.74739458 |
| H | 7.19033076   | -4.19922669 | -5.55911411 |
| C | 5.84716830   | -4.19782267 | -3.18958103 |
| C | 11.32555610  | -5.72634756 | -4.06993296 |
| H | 7.17721536   | -4.78031259 | -3.48668221 |
| C | 18.67265631  | -2.82081966 | -1.95157498 |
| C | 19.53547997  | -0.58639389 | -0.45490068 |
| C | 9.85808425   | -5.55999937 | -3.93698833 |

|   |             |             |             |
|---|-------------|-------------|-------------|
| C | 17.80886134 | -3.87527698 | -2.53739548 |
| H | 19.77236500 | 1.89012824  | -0.00068076 |
| C | 20.23811681 | 2.04531126  | -0.97018708 |
| C | 4.88101860  | -4.88138995 | -2.44372236 |
| C | 5.06631033  | -5.90866817 | -2.14177316 |
| H | 19.53548860 | 0.58645276  | 0.45391105  |
| C | 19.01431642 | -0.43040519 | -1.74369446 |
| H | 18.81159624 | 0.56670622  | -2.12313929 |
| C | 18.67262493 | 2.82083703  | 1.95062242  |
| C | 14.14587896 | -5.60245473 | -3.86616033 |
| H | 4.37661167  | -2.27102678 | -3.23033334 |
| C | 4.21679564  | -1.23384929 | -3.51096482 |
| H | 17.02738868 | -4.65295065 | -1.67578085 |
| C | 17.21202291 | -4.61711293 | -0.60616051 |
| C | 15.91276629 | 5.33424489  | 2.14297731  |
| C | 15.25136817 | 5.81420707  | 1.42780313  |
| C | 7.92336201  | -5.39599421 | -2.47754169 |
| H | 7.49283895  | -5.50645949 | -1.48614069 |
| C | 9.85796820  | 5.56016537  | 3.93706275  |
| C | 19.34717674 | 2.98884018  | 0.73482708  |
| H | 19.48511611 | 3.98783624  | 0.32984561  |
| C | 12.06067072 | -4.78514280 | -4.79872922 |
| H | 11.54069560 | -4.01565203 | -5.36125547 |
| C | 15.91292430 | -5.33436411 | -2.14382485 |
| C | 15.25156376 | -5.81434587 | -1.42862904 |
| H | 9.24208769  | -5.77278683 | -2.69753158 |
| C | 9.82650829  | -6.16028211 | -1.86821211 |
| H | 19.34729973 | -2.98879112 | -0.73582717 |
| C | 19.48533185 | -3.98778285 | -0.33086633 |
| C | 12.03859662 | 6.68546867  | 3.33968430  |
| H | 11.50132862 | 7.46876261  | 2.81214602  |
| C | 15.53948598 | 5.26197400  | 3.48896998  |
| H | 18.59165578 | -1.52787177 | -2.47901109 |
| C | 18.06732389 | -1.36307126 | -3.41558423 |
| H | 19.77247031 | -1.89005852 | -0.00033834 |
| C | 20.23830451 | -2.04522156 | 0.96913172  |
| C | 5.84660161  | 4.19857786  | 3.19109047  |
| H | 13.44277141 | -4.72458637 | -4.69931990 |

|   |             |             |             |
|---|-------------|-------------|-------------|
| C | 13.97019105 | -3.90860653 | -5.18414314 |
| H | 13.42296055 | -6.62472500 | -3.23938154 |
| C | 13.94533856 | -7.35741530 | -2.63020152 |
| H | 9.24174055  | 5.77259908  | 2.69766421  |
| C | 9.82606373  | 6.15965048  | 1.86806637  |
| H | 13.42280302 | 6.62452301  | 3.23863957  |
| C | 13.94512372 | 7.35716198  | 2.62934895  |
| H | 12.06066453 | 4.78509222  | 4.79830884  |
| C | 11.54071936 | 4.01568230  | 5.36097649  |
| C | 19.01444300 | 0.43044443  | 1.74274927  |
| H | 18.81181918 | -0.56667608 | 2.12222205  |
| C | 7.17681689  | 4.78093003  | 3.48770620  |
| H | 3.41979178  | 2.94391315  | 2.46121587  |
| C | 7.92288241  | 5.39600549  | 2.47813261  |
| C | 7.49216616  | 5.50614447  | 1.48677948  |
| H | 18.59176056 | 1.52789107  | 2.47808337  |
| C | 18.06750783 | 1.36306259  | 3.41469570  |
| H | 12.03873627 | -6.68560229 | -3.34022094 |
| C | 11.50152701 | -7.46891231 | -2.81264819 |
| C | 17.53236014 | 3.94289908  | 3.90774510  |
| H | 18.16210901 | 3.40393176  | 4.61050316  |
| C | 5.56186932  | 2.89084443  | 3.59664826  |
| H | 6.30679801  | 2.33168611  | 4.15543197  |
| C | 9.08028048  | 5.02486183  | 4.97090609  |
| C | 9.51418254  | 4.89279579  | 5.95807115  |
| H | 4.88057054  | 4.88188625  | 2.44483749  |
| C | 5.06602382  | 5.90897017  | 2.14232718  |
| H | 4.37573763  | 2.27203792  | 3.23284331  |
| C | 4.21577292  | 1.23503999  | 3.51405219  |
| C | 15.53960689 | -5.26213244 | -3.48981251 |
| H | 9.08026746  | -5.02410549 | -4.97043174 |
| C | 9.51394663  | -4.89175260 | -5.95765496 |
| H | 3.42048376  | -2.94322994 | -2.45921583 |
| C | 5.56268986  | -2.88979744 | -3.59438133 |
| C | 6.30775899  | -2.33044506 | -4.15278614 |
| H | 11.32549329 | 5.72632248  | 4.06960987  |
| C | 3.68389834  | -4.27022572 | -2.09451475 |
| C | 2.94425862  | -4.83023853 | -1.53009214 |



|   |             |             |             |
|---|-------------|-------------|-------------|
| C | 17.80878657 | 3.87524161  | 2.53647543  |
| C | 17.02725104 | 4.65289009  | 1.67489411  |
| C | 17.21185643 | 4.61707817  | 0.60526805  |
| C | 13.44274591 | 4.72445106  | 4.69866889  |
| C | 13.97020344 | 3.90847022  | 5.18344918  |
| C | 17.53240470 | -3.94296727 | -3.90865735 |
| C | 18.16210716 | -3.40397310 | -4.61143659 |
| C | 14.14577334 | 5.60227322  | 3.86539324  |
| C | 16.41691721 | -4.62506346 | -4.37652715 |
| C | 16.19126301 | -4.61148861 | -5.43941527 |
| C | 16.41685117 | 4.62493310  | 4.37565148  |
| C | 16.19123168 | 4.61133981  | 5.43854657  |
| C | 3.68339526  | 4.27069709  | 2.09587130  |
| C | 2.94389769  | 4.83051475  | 1.53107084  |
| C | 7.76670866  | 4.63547469  | 4.74834337  |
| C | 7.19027530  | 4.20071094  | 5.56038270  |
| C | 11.94480286 | 3.03147597  | 1.99552401  |
| C | 13.27255806 | 2.84409054  | 1.87390794  |
| C | 14.34564485 | 2.35450581  | 1.55028448  |
| C | 15.24254668 | 1.51681722  | 0.99487676  |
| C | 15.68565796 | 0.56396275  | 0.36820851  |
| C | 15.68551053 | -0.56424166 | -0.36880269 |
| C | 15.24262013 | -1.51713865 | -0.99556166 |
| C | 14.34548769 | -2.35459719 | -1.55094711 |
| C | 13.27250001 | -2.84425194 | -1.87479272 |
| C | 11.94469840 | -3.03126382 | -1.99647117 |
| C | 10.73624373 | -2.87287682 | -1.89748613 |
| C | 9.55632997  | -2.32889501 | -1.54309511 |
| C | 8.74758007  | -1.56201749 | -1.03938580 |
| C | 8.28139682  | -0.50883037 | -0.33974139 |
| C | 8.28134237  | 0.50942453  | 0.33782416  |
| C | 8.74784826  | 1.56243540  | 1.03751798  |
| C | 9.55640247  | 2.32931708  | 1.54152895  |
| C | 10.73639402 | 2.87300331  | 1.89612134  |

---

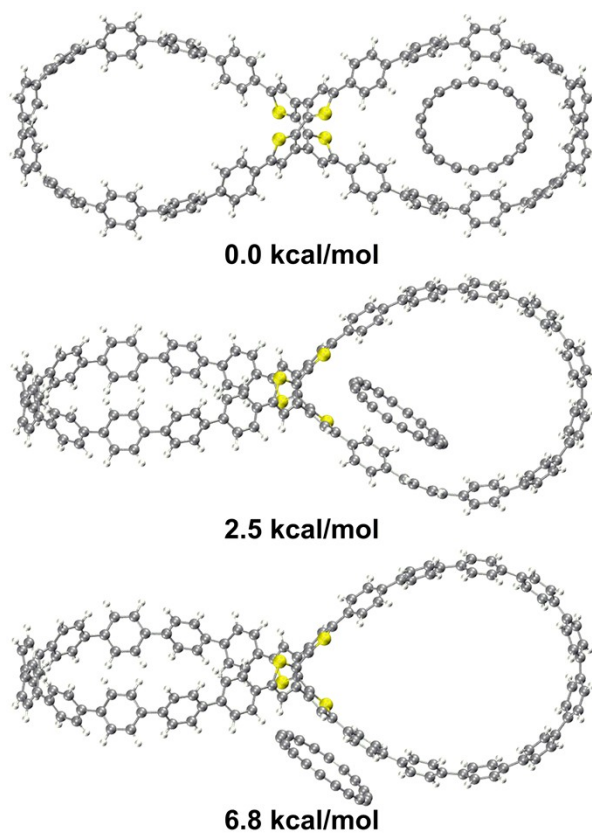

**Fig. S2.** Comparison of different complexation schemes between  $C_{18}$  and OPP. Relative electronic energies of different  $C_{18}@OPP$  configurations evaluated at  $\omega B97X-V/def2-TZVP$  level, with the first one as a reference.

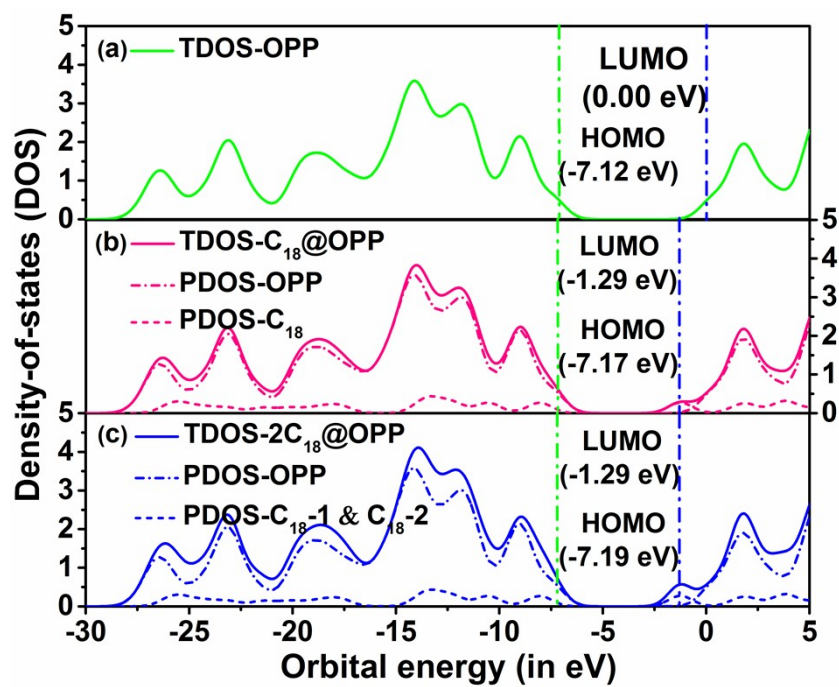

**Fig. S3.** DOS maps and energy levels of FMOs of (a) OPP, (b) C<sub>18</sub>@OPP, and (c) 2C<sub>18</sub>@OPP.
